# Supplementary material
Source: PubMed Central journal article supplement (PMC3501083)
Supplement: supp_M112.357707_M357707_Supplemental_Materials.pdf [file supp_M112.357707_M357707_Supplemental_Materials.pdf]

## SUPPLEMENTAL MATERIALS

### Supplemental Table:

**Table S1.** Fibroblast cell lines from Coriell Cell Repository.

| <i>Eponym of disease</i> | <i>Disease name</i>               | <i>Abbreviation</i> | <i>Affected gene</i> | <i>Protein</i>                                     | <i>Accumulated Lipid</i>           | <i>Genotype</i>               | <i>Coriell Catalog #</i> |
|--------------------------|-----------------------------------|---------------------|----------------------|----------------------------------------------------|------------------------------------|-------------------------------|--------------------------|
| Batten                   | Ceroid lipofuscinosis, neuronal 2 | CLN2                | <i>TPP1</i>          | Tripeptidyl peptidase I                            | lipopigments (lipofuscin)          | p.R127X, p.R208X              | GM16485                  |
| Fabry                    | Alpha-galactosidase A deficiency  |                     | <i>GLA</i>           | Alpha galactosidase A                              | globotriaosylceramide              | p.W162X, rs2071397, rs2071228 | GM00107                  |
| Farber                   | Lipogranulomatosis                |                     | <i>AC</i>            | Acid ceramidase (N-acylsphingosine amidohydrolase) | ceramide                           | p.Y36C, p.Y36C                | GM20015                  |
| Niemann-Pick, type C1    |                                   | NPC1                | <i>NPC1</i>          | NPC1                                               | Unesterified cholesterol           | p.P237S, p.I1061T             | GM03123                  |
| Niemann-Pick, type C2    |                                   | NPC2                | <i>NPC2</i>          | NPC2                                               | Unesterified cholesterol           | p.C93F, p.C93F                | GM17910                  |
| Niemann-Pick, type A     |                                   | NPA                 | <i>ASM</i>           | Acid sphingomyelinase                              | Sphingomyelin                      | p.L302P, p.L302P              | GM16195                  |
| Sanfilippo type B        | Mucopolysaccharidosis III type B  | MPS IIIB            | <i>NAGLU</i>         | N-acetyl-alpha-D-glucosaminidase                   | Partially degraded heparan sulfate | p.R297X, p.R643H              | GM02552                  |
| Tay-Sachs                | GM2 gangliosidosis                | TSD                 |                      | Beta hexosaminidase A                              | GM2 ganglioside                    | c.1278insTATC, c.1278insTATC  | GM00221                  |
| Wolman                   | Lysosomal acid lipase deficiency  |                     | <i>LAL</i>           | Lysosomal acid lipase                              | Cholesteryl ester & triglycerides  | unknown                       | GM11851                  |

### Supplemental Figures:

A. Unesterified cholesterol in NPC2 cells

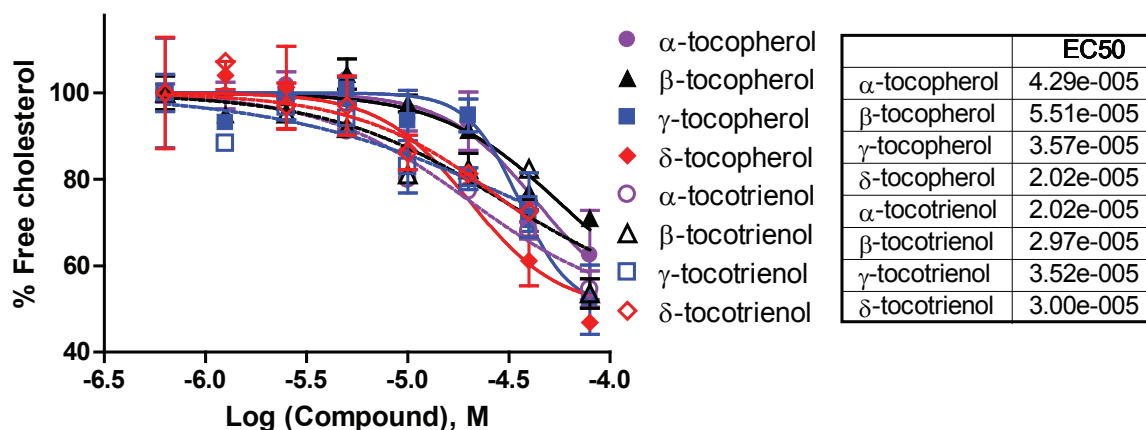

B. Unesterified cholesterol in NPC1 cells

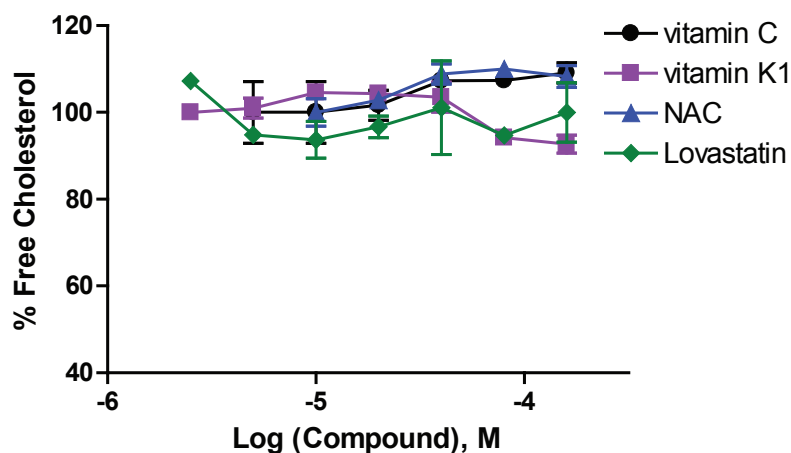

**Figure S1.** Levels of cellular unesterified (free) cholesterol in NPC2 fibroblasts after the treatments with eight vitamin E isoforms and in NPC1 fibroblasts after the treatments with other vitamins. **(A)** Concentration-response curves of eight vitamin E isoforms on cellular unesterified cholesterol level in the NPC2 fibroblasts were determined by the Amplex cholesterol assay. The cells were treated with compounds with concentration ranging from 0.63 to 80  $\mu$ M except  $\gamma$ -tocotrienol and  $\delta$ -tocotrienol that ranged from 0.63 to 40  $\mu$ M.  $\delta$ -T was the most potent compounds with an  $EC_{50}$  value of 20.2  $\mu$ M. **(B)** Concentration-response curves of vitamin C, vitamin K, NAC and lovastatin on cellular unesterified cholesterol level in the NPC1 fibroblasts determined by the Amplex-red cholesterol assay. These four compounds did not reduce the unesterified cholesterol level in the NPC1 fibroblasts.

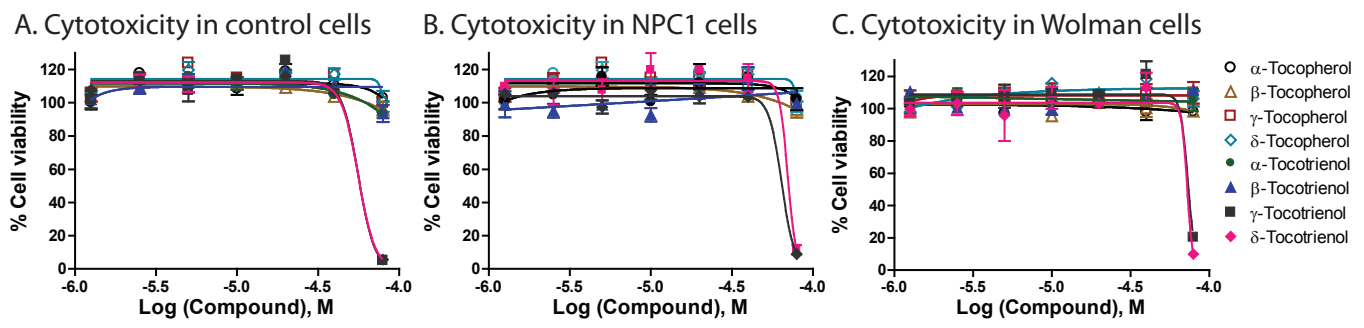

**Figure S2.** Cytotoxicity of eight vitamin E isoforms in control, NPC1 and Wolman fibroblasts. Cytotoxicity of eight vitamin E isoforms was measured by an ATP content assay in the control (A), NPC1 (B), and Wolman (C) fibroblasts. Except  $\gamma$ -tocotrienol and  $\delta$ -tocotrienol which were cytotoxic at 80  $\mu$ M (but not cytotoxic at the concentrations less than 40  $\mu$ M), the other six isoforms of vitamin E including  $\delta$ -T and  $\alpha$ -T were not cytotoxic at the concentration up to 80  $\mu$ M after a 4-day treatment in these cells.

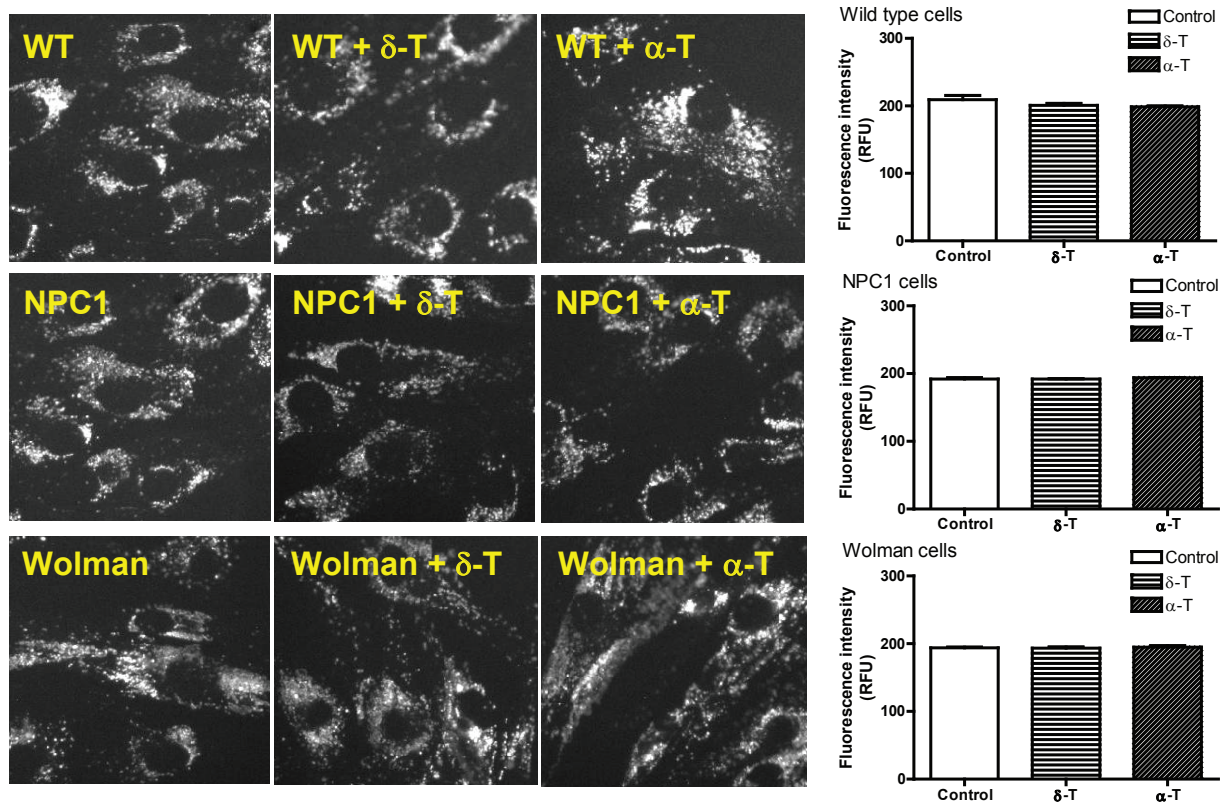

**Figure S3.** Lysosomal pH indicated by a LysoSensor dextran dye in NPC1 and Wolman fibroblasts. The method was described previously by Chen and colleagues (Chen Q, Zhang CL, Luther RW and Mixson AJ. *Nucleic Acids Res* 30:1338-45, 2002). Briefly, cells were incubated with 40  $\mu$ M  $\delta$ -T for 24 hrs and the indicator dye (catalog # L-22460, Invitrogen) for 16 hrs. The images were taken using Incell2000 (GE healthcare) with an excitation of 360 nm, emission-1 of 530 and emission-2 of 450 nm. The imaging analysis was performed using the software provided with the Incell2000 imaging analyzer. The fluorescence intensity at emission 530 nm represents dye staining in late endosomes/lysosomes and endocytic vesicles that becomes strong at acidic pH. The data indicated that the treatment with  $\delta$ -T in these cells does not alter pH in late endosomes/lysosomes compared with untreated cells. The fluorescence intensity at emission 450 nm (dye staining in non-acidic compartments) was much weak because the dye was concentrated in the acidic compartments including late endosomes/lysosomes (images not shown).

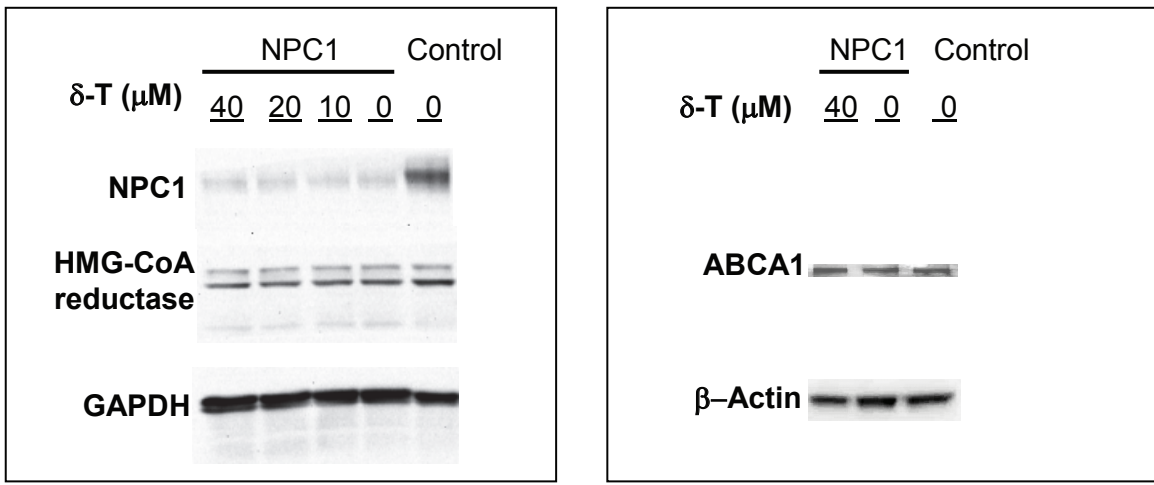

**Figure S4.** Protein levels of NPC1, HMG-CoA reductase and ABCA1 in response to  $\delta$ -T treatment. Compared with control cells, 40  $\mu$ M  $\delta$ -T treatment for four days did not alter the protein levels of NPC1, HMG-CoA reductase and ABCA1 steroid transporter in NPC1 fibroblasts.

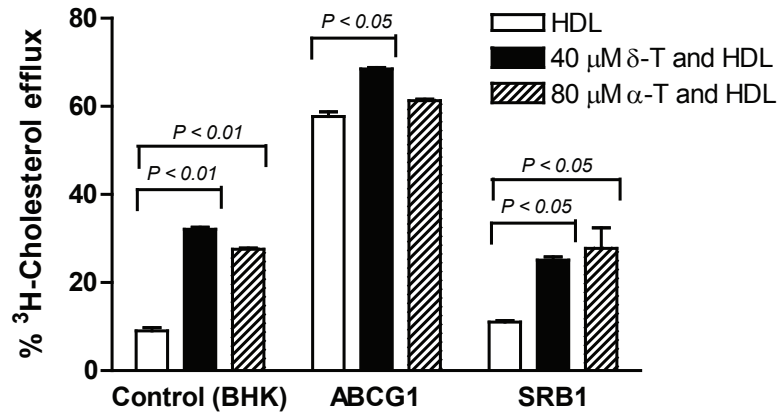

**Figure S5.** [ $^3$ H]-cholesterol efflux in the ABCG1 and SRB1 overexpressing cells in the presence of or absence of  $\delta$ -T and  $\alpha$ -T.  $^3$ H-cholesterol efflux greatly increased in the ABCG1 transformed cells and slightly increased in the SR-BI transformed cells.  $\delta$ -T was able to further increase the cholesterol efflux in both transformed cell lines.

A. Cytosolic  $\text{Ca}^{2+}$  response in the absence of extracellular  $\text{Ca}^{2+}$

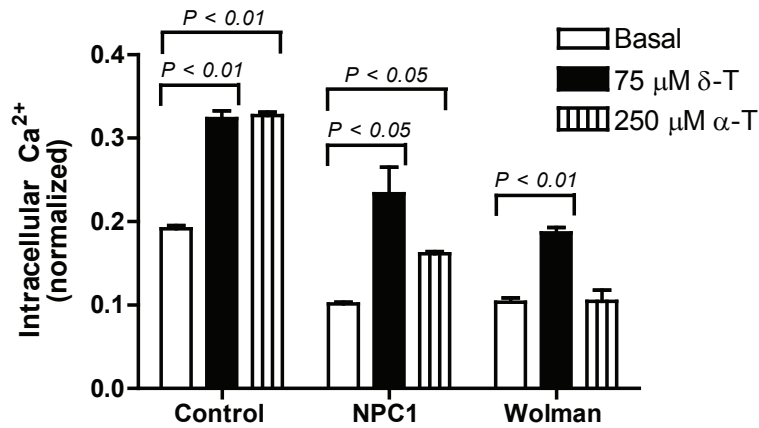

B. Lysosomal  $\text{Ca}^{2+}$  release in the absence of extracellular  $\text{Ca}^{2+}$

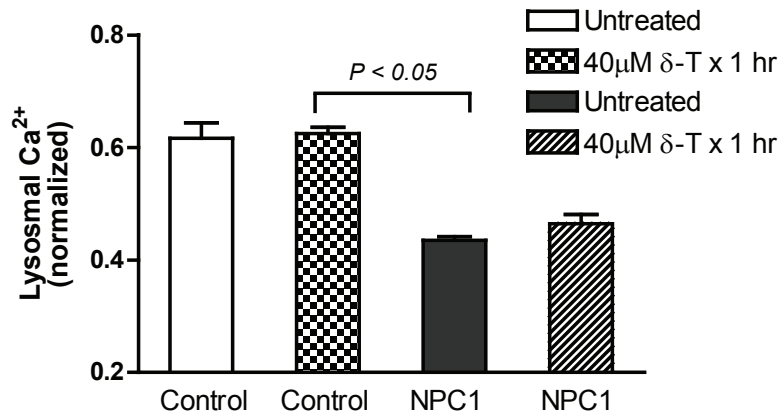

**Figure S6.** Cytosolic  $\text{Ca}^{2+}$  response to  $\delta\text{-T}$  and  $\alpha\text{-T}$ , lysosomal  $\text{Ca}^{2+}$  release induced by GPN in the absence extracellular  $\text{Ca}^{2+}$ . **(A)** Similarly as in the presence of extracellular  $\text{Ca}^{2+}$  (Fig. 4B), 75  $\mu\text{M}$   $\delta\text{-T}$  significantly stimulated cytosolic  $\text{Ca}^{2+}$  release in the absence of extracellular  $\text{Ca}^{2+}$  in both NPC1 and Wolman fibroblasts. **(B)** Lysosomal  $\text{Ca}^{2+}$  release was induced by 200 nM Gly-Phe  $\beta$ -naphthylamide (GPN) in the absence of extracellular  $\text{Ca}^{2+}$  in NPC1 fibroblasts. In NPC1 cells, lysosomal  $\text{Ca}^{2+}$  release in response to GPN was 30 % less than that of control cells. This reduction of lysosomal  $\text{Ca}^{2+}$  release in NPC1 cells was not significantly altered after the cells were treated with 40  $\mu\text{M}$   $\delta\text{-T}$  for 1 hour.

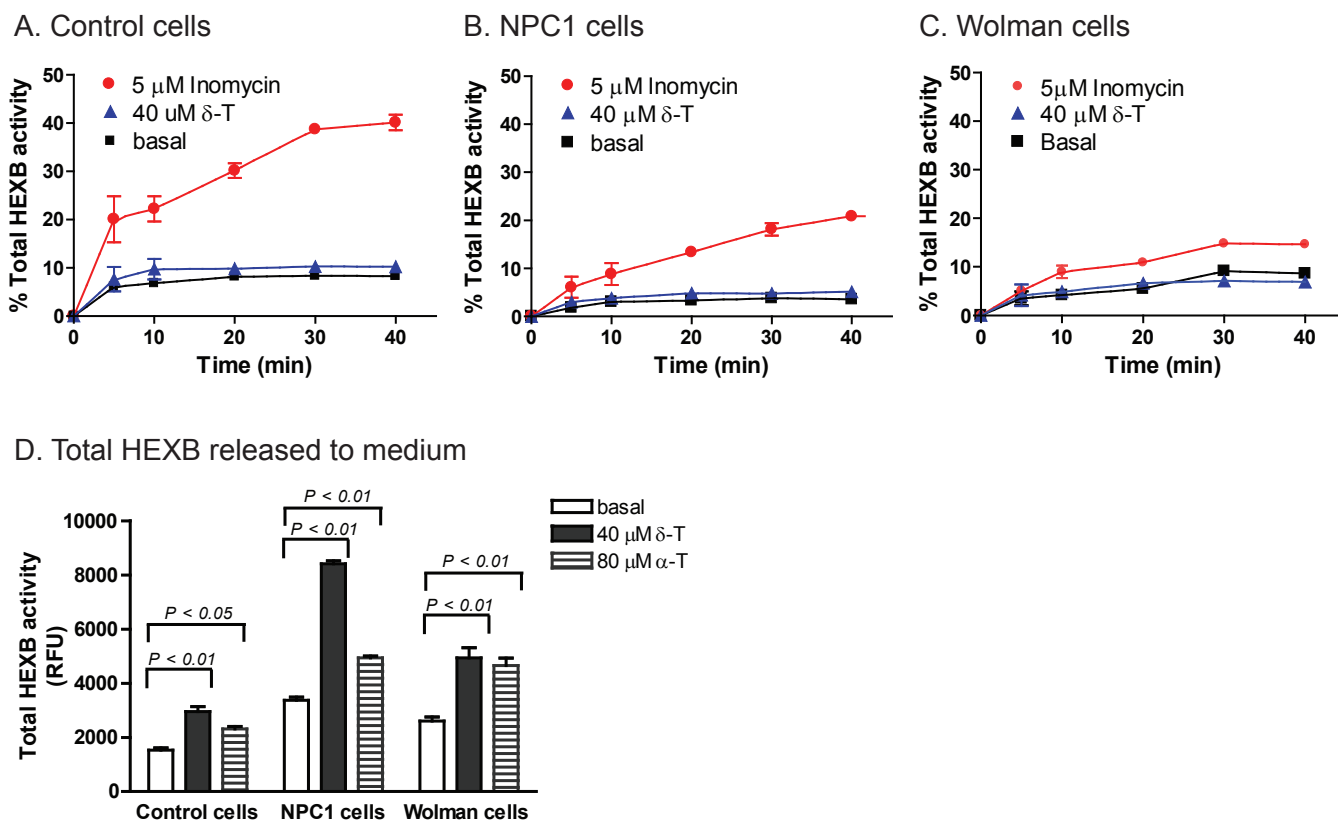

**Figure S7.** Lysosomal exocytosis in NPC1 and Wolman fibroblasts after one hour treatment with  $\delta$ -T or  $\alpha$ -T. When both compounds were added to NPC1 (**B**) and Wolman (**C**) fibroblasts as well as control fibroblasts (**A**) for 1 hour, 40  $\mu$ M  $\delta$ -T or 80  $\mu$ M  $\alpha$ -T did not alter the activity of HEXB (a lysosomal enzyme) in extracellular medium. This data indicated that 40  $\mu$ M  $\delta$ -T or 80  $\mu$ M  $\alpha$ -T did not have the immediate effect on exocytosis in these cells, which was differently from the significant enhancement of exocytosis observed after a 24-hour treatment of 40  $\mu$ M  $\delta$ -T or 80  $\mu$ M  $\alpha$ -T in these cells (Fig. 5). (D) Increase in the total HEXB enzyme activity secreted into the medium in 30 min from the fibroblasts after a 24 hr pretreatment with 40  $\mu$ M  $\delta$ -T or 80  $\mu$ M  $\alpha$ -T. The experiment was performed in 24-well plates with cells at 30,000 cells/well. In all three cell types,  $\delta$ -T and  $\alpha$ -T significantly stimulated the secretion of HEXB into the medium. The basal HEXB secreted into the medium in both NPC1 and Wolman was also significantly higher than that in control cells ( $P < 0.01$  in both). The data shown are mean of three experiments and the error bars represent SD.
